# Supplementary material
Source: publisher site journal article supplement (https://www.dovepress.com/article/434196)
Supplement: Supplementary file 1 [file get_supplementary_file.php]

**Supplementary Materials**

**Table S1** Kinetics curve, r, kobs, t0.9 and t0.5 of flavonoids (CAG, ON, CA and FMN) in different pH environments.

| Condition | Artificial gastric juice | | | | | Artificial small bowel fluid | | | | | Artificial colonic fluid | | | | | |
| --- | --- | --- | --- | --- | --- | --- | --- | --- | --- | --- | --- | --- | --- | --- | --- | --- |
| Kinetics curve | r | Kobs(h-1) | t0.9(h) | t0.5(h) | Kinetics curve | r | Kobs(h-1) | t0.9(h) | t0.5(h) | Kinetics curve | r | Kobs(h-1) | t0.9(h) | t0.5(h) |
| CAG | y=-0.0086x | 0.9931 | 0.0086 | 12.21 | 80.58 | y=-0.0116x | 0.9950 | 0.0116 | 9.05 | 59.74 | y=-0.0152x | 0.9932 | 0.0152 | 6.91 | 45.59 |
| CAG-APS  (1:2) | y=-0.0033x | 0.9756 | 0.0033 | 31.82 | 210.00 | y=-0.0071x | 0.9746 | 0.0071 | 14.79 | 97.61 | y=-0.0077x | 0.9652 | 0.0077 | 13.64 | 90.00 |
| CAG-APS  (1:4) | y=-0.0070x | 0.9903 | 0.0070 | 15.00 | 99.00 | y=-0.0044x | 0.9831 | 0.0044 | 23.86 | 157.50 | y=-0.0056x | 0.9851 | 0.0056 | 18.75 | 123.75 |
| CAG-APS  (1:8) | y=-0.0080x | 0.9937 | 0.0080 | 13.13 | 86.63 | y=-0.0047x | 0.9974 | 0.0047 | 22.34 | 147.45 | y=-0.0131x | 0.9940 | 0.0131 | 8.02 | 52.90 |
| CAG-APS  (1:16) | y=-0.0071x | 0.9959 | 0.0071 | 14.79 | 97.61 | y=-0.0035x | 0.9243 | 0.0035 | 30.00 | 198.00 | y=-0.0085x | 0.9540 | 0.0085 | 12.35 | 81.53 |
| ON | y= 0.0093x | 0.9972 | 0.0093 | 11.29 | 74.52 | y=-0.0133x | 0.9930 | 0.0133 | 7.89 | 52.11 | y=-0.0149x | 0.9938 | 0.0149 | 7.05 | 46.51 |
| ON-APS  (1:2) | y=-0.0051x | 0.9956 | 0.0051 | 20.59 | 135.88 | y=-0.01x | 0.9898 | 0.01 | 10.50 | 69.30 | y=-0.0072x | 0.9578 | 0.0072 | 14.58 | 96.25 |
| ON-APS  (1:4) | y=-0.079x | 0.9931 | 0.079 | 13.29 | 87.72 | y=-0.0062x | 0.9724 | 0.0062 | 16.94 | 111.77 | y=-0.0048x | 0.9893 | 0.0048 | 21.88 | 144.38 |
| ON-APS  (1:8) | y=-0.0088x | 0.9939 | 0.0088 | 11.93 | 78.75 | y=-0.0116x | 0.9876 | 0.0116 | 9.05 | 59.74 | y=-0.0093x | 0.9872 | 0.0093 | 11.29 | 74.52 |
| ON-APS  (1:16) | y=-0.009x | 0.9994 | 0.0090 | 11.67 | 77.00 | y=-0.0059x | 0.9877 | 0.0059 | 17.80 | 117.46 | y=-0.0107x | 0.9901 | 0.0107 | 9.81 | 64.77 |
| CA | y=-0.0134x | 0.9965 | 0.0134 | 7.84 | 51.72 | y=-0.0108x | 0.9924 | 0.0108 | 9.72 | 64.17 | y=-0.0114x | 0.9961 | 0.0114 | 9.21 | 60.79 |
| CA-APS  (1:2) | y=-0.0071x | 0.9943 | 0.0071 | 14.79 | 97.61 | y=-0.009x | 0.9794 | 0.009 | 11.67 | 77.00 | y=-0.0101x | 0.9928 | 0.0101 | 10.40 | 68.61 |
| CA-APS  (1:4) | y=-0.0113x | 0.9903 | 0.0113 | 9.29 | 61.33 | y=-0.0068x | 0.9980 | 0.0068 | 15.44 | 101.91 | y=-0.0025x | 0.9612 | 0.0025 | 42.00 | 277.20 |
| CA-APS  (1:8) | y=-0.0026x | 0.9655 | 0.0026 | 40.38 | 266.54 | y=-0.0077x | 0.9646 | 0.0077 | 13.64 | 90.00 | y=-0.0067x | 0.9890 | 0.0067 | 15.67 | 103.43 |
| CA-APS  (1:16) | y=-0.013x | 0.9961 | 0.013 | 8.08 | 53.31 | y=-0.0099x | 0.9944 | 0.0099 | 10.61 | 70.00 | y=-0.0039x | 0.9751 | 0.0039 | 26.92 | 177.69 |
| FMN | y=-0.0244x | 0.9996 | 0.0244 | 4.30 | 28.40 | y=-0.0221x | 0.9910 | 0.0221 | 4.75 | 31.36 | y=-0.038x | 0.9968 | 0.038 | 2.76 | 18.24 |
| FMN-APS  (1:2) | y=-0.0237x | 0.9981 | 0.0237 | 4.43 | 29.24 | y=-0.0136x | 0.9872 | 0.0136 | 7.72 | 50.96 | y=-0.0066x | 0.9013 | 0.0066 | 15.91 | 105.00 |
| FMN-APS  (1:4) | y=-0.0149x | 0.9935 | 0.0149 | 7.05 | 46.51 | y=-0.0131x | 0.9876 | 0.0131 | 8.02 | 52.90 | y=-0.0149x | 0.9825 | 0.0149 | 7.05 | 46.51 |
| FMN-APS  (1:8) | y=-0.0209x | 0.9987 | 0.0209 | 5.02 | 33.16 | y=-0.0209x | 0.9943 | 0.0209 | 5.02 | 33.16 | y=-0.0187x | 0.9875 | 0.0187 | 5.61 | 37.06 |
| FMN-APS  (1:16) | y=-0.0056x | 0.9951 | 0.0056 | 18.75 | 123.75 | y=-0.0069x | 0.9774 | 0.0069 | 15.22 | 100.43 | y=-0.023x | 0.9892 | 0.023 | 4.57 | 30.13 |

APS: Astragalus polysaccharides ; CAG: Calycosin*-7-O-β-D-*glucoside; ON: Ononin; CA: Calycosin; FMN: Formononetin; r:Correlation coefficients; Kobs: Rate constants; t0.9: One-tenth-life; t0.5: Half-life.

**Table S2** Main pharmacokinetic parameters of four flavonoids in rats after oral administration. (Mean ± SD, *n* = 6)

| Parameters | | AUC0-t (ng/L•h) | AUC0-∞ (ng/L•h) | MRT0-t (h) | *t*1/2 (h) | *C*max ( mg/L) |
| --- | --- | --- | --- | --- | --- | --- |
| CAG | flavonoids | 183 ± 39.67 | 187.28 ± 34.36 | 4.92 ± 0.85 | 3.51 ± 0.62 | 87.44 ± 25.04 |
| flavonoids-APS | 235.81 ± 40.69** | 238.53 ± 43.79** | 4.52 ± 0.21 | 4.22 ± 0.61 | 113.73 ± 13.99 |
| ON | flavonoids | 171.19 ± 28.77 | 238.48 ± 47.74 | 7.08 ± 0.43 | 8.00 ± 1.27 | 80.44 ± 22.99 |
| flavonoids-APS | 253.81 ± 31.62** | 347.49 ± 95.93* | 5.26 ± 0.35** | 10.62 ± 1.94 | 197.42 ± 21.49** |
| CA | flavonoids | 6506.46 ± 875.73 | 6683.38 ± 610.82 | 3.91 ± 0.49 | 2.13 ± 0.79 | 2022.32 ± 332.44 |
| flavonoids-APS | 10623.52 ± 1610.98** | 10681.05 ± 1618.74* | 4.94 ± 0.33* | 2.89 ± 0.10 | 3508.93 ± 515.43** |
| FMN | flavonoids | 982.80 ± 134.99 | 1130.50 ± 286.86 | 3.95 ± 0.30 | 2.25 ± 0.68 | 340.14 ± 23.22 |
| flavonoids-APS | 1478.49 ± 286.86** | 1502.56 ± 313.79 | 4.07 ± 0.33d | 2.72 ± 0.54 | 654.73 ± 133.30** |

CAG: Calycosin*-7-O-β-D-*glucoside; ON: Ononin; CA: Calycosin; FMN: Formononetin; SD: Standard deviation; AUC: Area under the concentration-time curve; MRT: Mean residence time; t1/2: Half-time; Cmax: Maximum concentration.**P* ≤0.05 compared with flavonoids; ***P* ≤ 0.01 compared with flavonoids.

**Table S3** Calibration curves, correlation coefficients (r) and LLOQs of analytes.

| Components | Calibration curves | r | LLOQ (ng/mL-1) | Range |
| --- | --- | --- | --- | --- |
| CAG | *Y* = 0.0353*X* + 0.0023 | 0.9916 | 0.78 | 0.78-100 ng/mL |
| ON | *Y*= 0.2007*X* + 0.0362 | 0.9969 | 2.35 | 0.29-300 ng/mL |
| CA | *Y*= 0.151*X* + 2.4621 | 0.9991 | 1.17 | 1.17-1200 ng/mL |
| FMN | *Y*= 0.76*X* + 0.1983 | 0.9940 | 0.78 | 0.39-50 ng/mL |

CAG: Calycosin*-7-O-β-D-*glucoside; ON: Ononin; CA: Calycosin; FMN: Formononetin; r: Correlation coefficients; LLQQ: Lower limit of quantification.

**Table S4** Accuracy and precision for four flavonoids detection in rat plasma (Mean ± SD, *n* = 6 ).

| Components | Nominal concentration (ng/mL) | Inter-day | | | Intra-day | | |
| --- | --- | --- | --- | --- | --- | --- | --- |
| concentration calculated (ng/mL) | Precision (RSD %) | Accuracy  (RE %) | concentration calculated (ng/mL) | Precision (RSD %) | Accuracy (RE %) |
| CAG | 3.13 | 3.08 ± 0.14 | 4.41 | 1.60 | 3.24 ± 0.16 | 5.08 | -3.51 |
| 50.0 | 48.76 ± 1.27 | 2.60 | 2.48 | 47.35 ± 2.15 | 4.53 | 5.30 |
| 80.0 | 78.33 ± 2.96 | 3.78 | 2.09 | 79.75± 1.77 | 2.22 | 0.31 |
| ON | 2.34 | 2.23 ± 0.03 | 1.57 | 4.70 | 2.26 ± 0.08 | 3.73 | 3.42 |
| 150.0 | 148.08 ± 3.82 | 2.58 | 1.28 | 151.58 ± 5.71 | 3.77 | -1.05 |
| 240.0 | 237.17 ± 7.30 | 3.08 | 1.18 | 245.59 ± 10.59 | 4.31 | -2.33 |
| CA | 4.69 | 4.44 ± 0.13 | 2.98 | 5.33 | 4.47 ± 0.21 | 4.64 | 4.69 |
| 600.0 | 596.34 ± 8.44 | 1.42 | 0.61 | 593.90 ± 25.41 | 4.28 | 1.02 |
| 960.0 | 957.31 ± 8.81 | 0.92 | 0.28 | 967.49 ± 26.63 | 2.75 | -0.78 |
| FMN | 1.56 | 1.50 ± 0.05 | 3.67 | 3.98 | 1.49 ± 0.06 | 4.12 | 4.49 |
| 25.0 | 24.51 ± 0.73 | 2.97 | 1.96 | 24.17 ± 1.30 | 5.40 | 3.32 |
| 40.0 | 39.29 ± 1.99 | 5.07 | 1.78 | 41.48 ± 1.69 | 4.07 | -3.70 |

CAG: Calycosin*-7-O-β-D-*glucoside; ON: Ononin; CA: Calycosin; FMN: Formononetin; SD: Standard deviation; RSD: Relative standard deviation; RE: Relative error.

**Table S5** The extraction recovery and matrix effect of each component in rat plasma.

| Components | Nominal concentration (ng/mL) | Recovery (%) | RSD  (%) | Matrix effect  (%) | RSD  (%) |
| --- | --- | --- | --- | --- | --- |
| CAG | 3.13 | 91.26 ± 9.41 | 10.31 | 94.77 ± 6.58 | 6.94 |
| 50.0 | 90.19 ± 7.01 | 7.77 | 105.96 ± 9.74 | 9.19 |
| 80.0 | 96.05 ± 6.37 | 6.64 | 95.23 ± 6.52 | 6.85 |
| ON | 2.34 | 91.17 ± 5.81 | 6.37 | 92.32 ± 4.21 | 4.57 |
| 150.0 | 93.24 ± 4.34 | 4.66 | 94.24 ± 2.43 | 2.58 |
| 240.0 | 94.44 ± 6.57 | 6.95 | 85.08± 2.30 | 2.42 |
| CA | 4.69 | 89.41 ± 4.77 | 5.33 | 95.70 ± 4.02 | 4.20 |
| 600.0 | 95.16 ± 1.20 | 1.26 | 100.18 ± 7.63 | 7.62 |
| 960.0 | 96.40 ± 1.65 | 1.72 | 99.61± 3.19 | 3.20 |
| FMN | 1.56 | 91.31 ± 4.82 | 5.28 | 96.83 ± 6.24 | 6.45 |
| 25.0 | 90.48 ± 5.33 | 5.89 | 93.60 ± 5.46 | 5.83 |
| 40.0 | 88.90 ± 6.05 | 6.81 | 104.02 ± 9.85 | 9.47 |

CAG: Calycosin*-7-O-β-D-*glucoside; ON: Ononin; CA: Calycosin; FMN: Formononetin; RSD: Relative standard deviation.

**Table S6** Results of stabiling enduration of four flavonoids in rat plasma (Mean ± SD, *n* = 6)

| Components | Nominal concentration  (ng/mL) | Three freeze-thaw cycles | | | 12 h autosampler storage | | | 6 h room temperature | | | -80 °C , 14 days | | |
| --- | --- | --- | --- | --- | --- | --- | --- | --- | --- | --- | --- | --- | --- |
| concentration calculated (ng/mL) | RSD (%) | RE (%) | back-calculated concentration (ng/mL) | RSD (%) | RE (%) | concentration  calculated (ng/mL) | RSD (%) | RE (%) | concentration calculated (ng/mL) | RSD (%) | RE (%) |
| CAG | 3.13 | 3.25 ± 0.12 | 3.81 | -3.83 | 3.23 ± 0.13 | 4.18 | -3.19 | 3.15 ± 0.28 | 8.88 | -0.64 | 3.09 ± 0.16 | 5.17 | 1.28 |
| 50.0 | 53.33 ± 3.32 | 6.22 | -6.66 | 49.06 ± 4.65 | 9.49 | 1.88 | 50.89 ± 2.71 | 5.32 | -1.78 | 42.40 ± 3.10 | 7.32 | -6.00 |
| 80.0 | 83.95 ± 3.98 | 4.74 | -4.94 | 84.50 ± 6.19 | 7.33 | -5.63 | 80.64 ± 4.09 | 5.07 | -0.80 | 81.33 ± 4.85 | 5.96 | -1.66 |
| ON | 2.34 | 2.37 ± 0.19 | 7.90 | -1.28 | 2.43 ± 0.15 | 6.03 | -3.85 | 2.46 ± 0.16 | 6.52 | -5.13 | 2.28 ± 0.12 | 5.30 | 2.56 |
| 150.0 | 152.91 ± 7.91 | 5.17 | -1.94 | 148.21 ± 7.00 | 4.72 | 1.19 | 149.04 ± 5.28 | 3.55 | 0.64 | 149.10 ± 9.35 | 6.27 | 0.60 |
| 240.0 | 236.56 ± 16.03 | 6.78 | 1.43 | 243.50 ± 9.82 | 4.03 | -1.46 | 242.64 ± 8.45 | 3.48 | -1.10 | 235.16 ± 14.36 | 6.11 | 2.02 |
| CA | 4.69 | 4.61 ± 0.33 | 7.14 | 1.71 | 4.36 ± 0.58 | 13.25 | 7.04 | 4.45 ± 0.22 | 4.88 | 5.12 | 4.55 ± 0.23 | 5.07 | 2.99 |
| 600.0 | 606.13 ± 36.23 | 5.98 | -1.02 | 582.40 ± 23.84 | 4.09 | 2.93 | 606.90 ± 22.68 | 3.74 | -1.15 | 589.61 ± 25.84 | 4.38 | 1.73 |
| 960.0 | 954.91 ± 69.16 | 4.54 | 0.53 | 958.96 ± 43.44 | 4.53 | 0.11 | 954.50 ± 28.08 | 2.94 | 0.57 | 973.37± 35.01 | 3.60 | -1.39 |
| FMN | 1.56 | 1.48 ± 0.13 | 8.46 | 5.13 | 1.54 ± 0.11 | 7.33 | 1.28 | 1.57 ± 0.15 | 9.51 | -0.64 | 1.47 ± 0.06 | 4.30 | 5.77 |
| 25.0 | 23.54 ± 1.12 | 4.77 | 5.84 | 25.75 ± 1.63 | 6.35 | -3.00 | 24.35 ± 0.77 | 3.15 | 2.60 | 24.62 ± 1.72 | 6.98 | 1.52 |
| 40.0 | 41.99 ± 1.97 | 4.68 | -4.98 | 41.02 ± 2.00 | 4.88 | -2.55 | 42.14 ± 2.52 | 5.97 | -5.35 | 41.69 ± 1.98 | 4.75 | -4.22 |

CAG: Calycosin*-7-O-β-D-*glucoside; ON: Ononin; CA: Calycosin; FMN: Formononetin; SD: Standard deviation; RSD: Relative standard deviation; RE: Relative error.
